# Supplementary material for: Review of the Current Status on Livestock Abortigenic Diseases Surveillance in Africa and Asia
Source: Preprints.org preprint supplement (doi:10.20944/preprints202403.0464.v1), 2024-03-08
Supplement: Supplementary file 1 [file supplementary]

**Supplementary File 2**

**Criteria list title/abstract**

| Criteria | Key element | Comments |
| --- | --- | --- |
| Cattle, Sheep, Goats | Population | Any paper that mentions ALL or ANY of these species will be included. |
| Abortifacient organisms commonly found in Africa and Asia. | Intervention/Exposure | Any of the following; Brucella spp, Neospora spp, Toxoplasma spp, Coxiella spp, Rift Valley Virus, Pestiviruses, Leptospira spp, Chlamydia spp, Campylobacter spp. |
| Abortion surveillance | Outcome | Surveillance or studies in support of surveillance of any of the mentioned common abortifacient agents. |
| English Language | Language | All articles/ abstracts should be in English language. |
| Africa and Asia | Geographical Region |  |
| Primary Information | Primary peer-reviewed article | Reviews and any article without primary information will be excluded. |
| None | Comparator | None |

**Criteria list fulltext**

| Criteria | Key element | Comments |
| --- | --- | --- |
| Cattle, Goats, Sheep | Population | Studies on the species of interest only. |
| Abortifacient organisms | Intervention/Exposure | Organisms of interest as outlined above. |
| Abortion | Outcome | Abortion in livestock spp of interest. |
| Africa and Asia | Region | Only in regions of interest |
| Surveillance technologies | Surveillance type |  |
| Only English | Language |  |
| Sample used for surveillance | Sample type during surveillance |  |
| Laboratory methodology used to confirm cases | Lab methodology | Any lab confirmation of cases done. |
| Linkage to formal surveillance system in the region | Survey | Either linked to government systems or independent studies. |
| Regions | Comparator | Systems will be compared regionwise. |
